# Supplementary material for: Traumatic brain injury to primary visual cortex produces long-lasting circuit dysfunction
Source: PubMed Central journal article supplement (PMC8599505; doi:10.1038/s42003-021-02808-5), 2021-11-17
Supplement: 42003_2021_2808_MOESM1_ESM.pdf [file 42003_2021_2808_MOESM1_ESM.pdf]

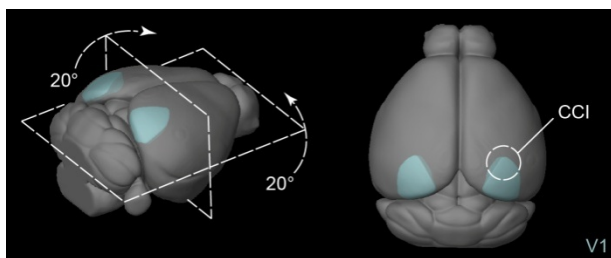

**Supplementary Figure 1.** Schematic of Allen Mouse Common Coordinate Framework showing the head rotation used to produce CCI injury over V1 (cyan). CCI injury was centered over rostral primary visual cortex (white circle).

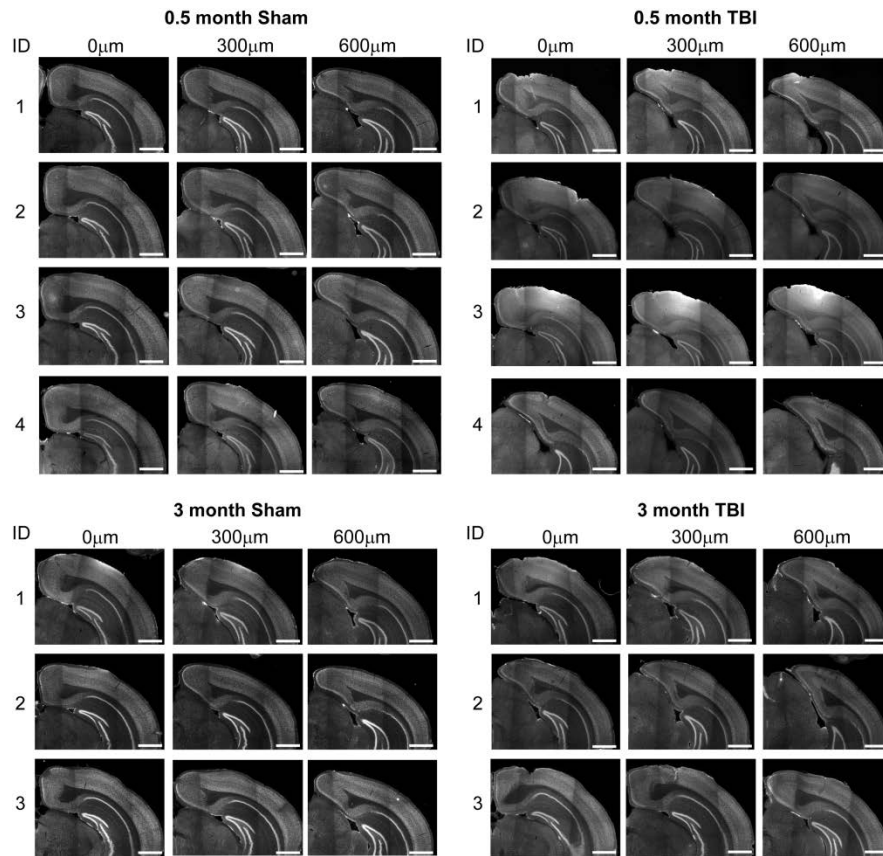

**Supplementary Figure 2.** Coronal sections of ipsilateral V1 showing NEUN labeling in all sham and brain injured animals used for histological quantifications in this study. ID, animal identification. Scale bars, 1mm.

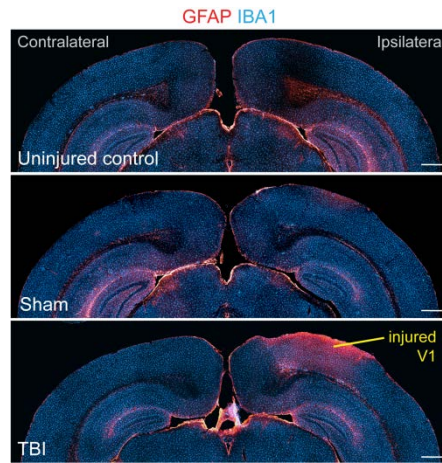

**Supplementary Figure 3.** Coronal sections of GFAP (red) and IBA1 (blue) labeling in an uninjured control animal and 3 months after sham or CCI injury. Scale bars, 500  $\mu$ m

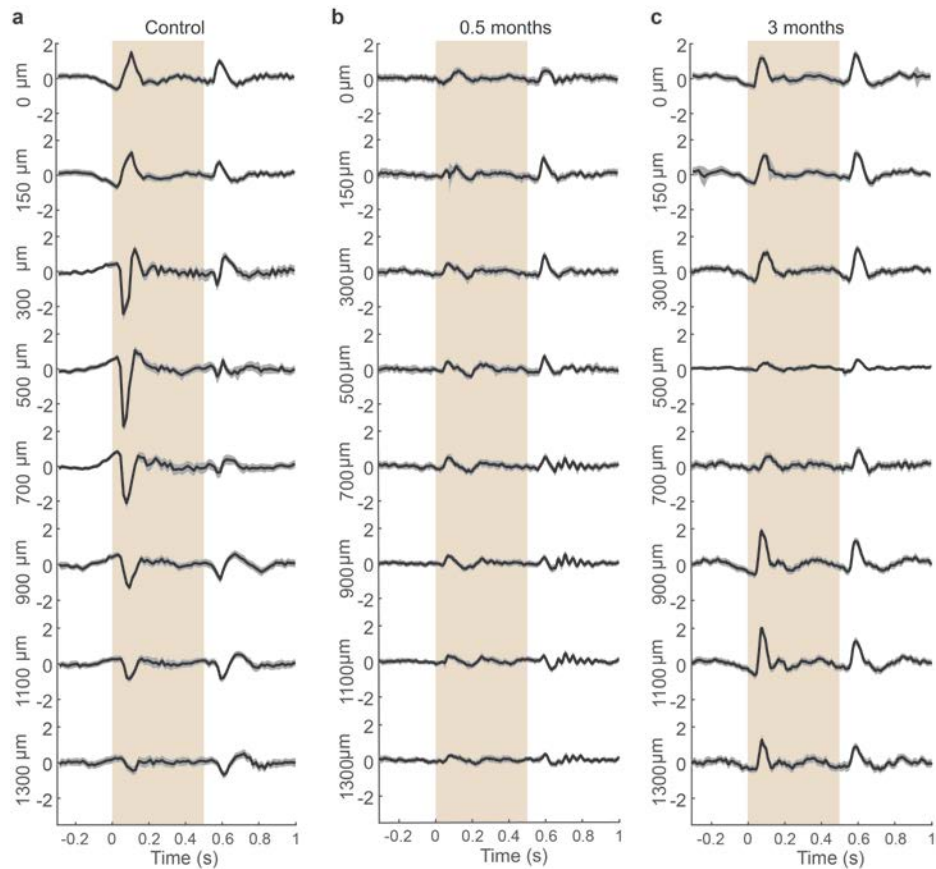

**Supplementary Figure 4. a-c.** Representative examples of LFP responses through the cortical depth in a control animal (a), and at the site of injury 0.5 months (b) and 3 months (c) after TBI. Grey shading indicates S.E.M. Visual stimulus was presented for 500 ms at Time 0 (beige background shading).

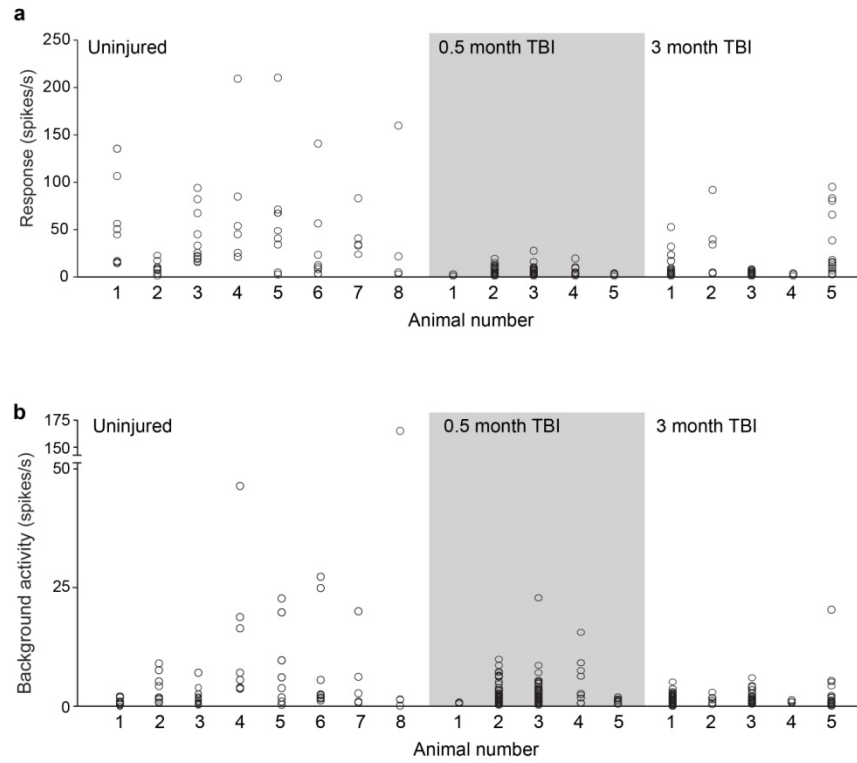

**Supplementary Figure 5a,b.** Distribution of peak response (a) and background activity (b) for each animal in the uninjured (left, 1-8), 0.5 months (middle, 1-5, gray shading) and 3 months (right, 1-5) after TBI groups.

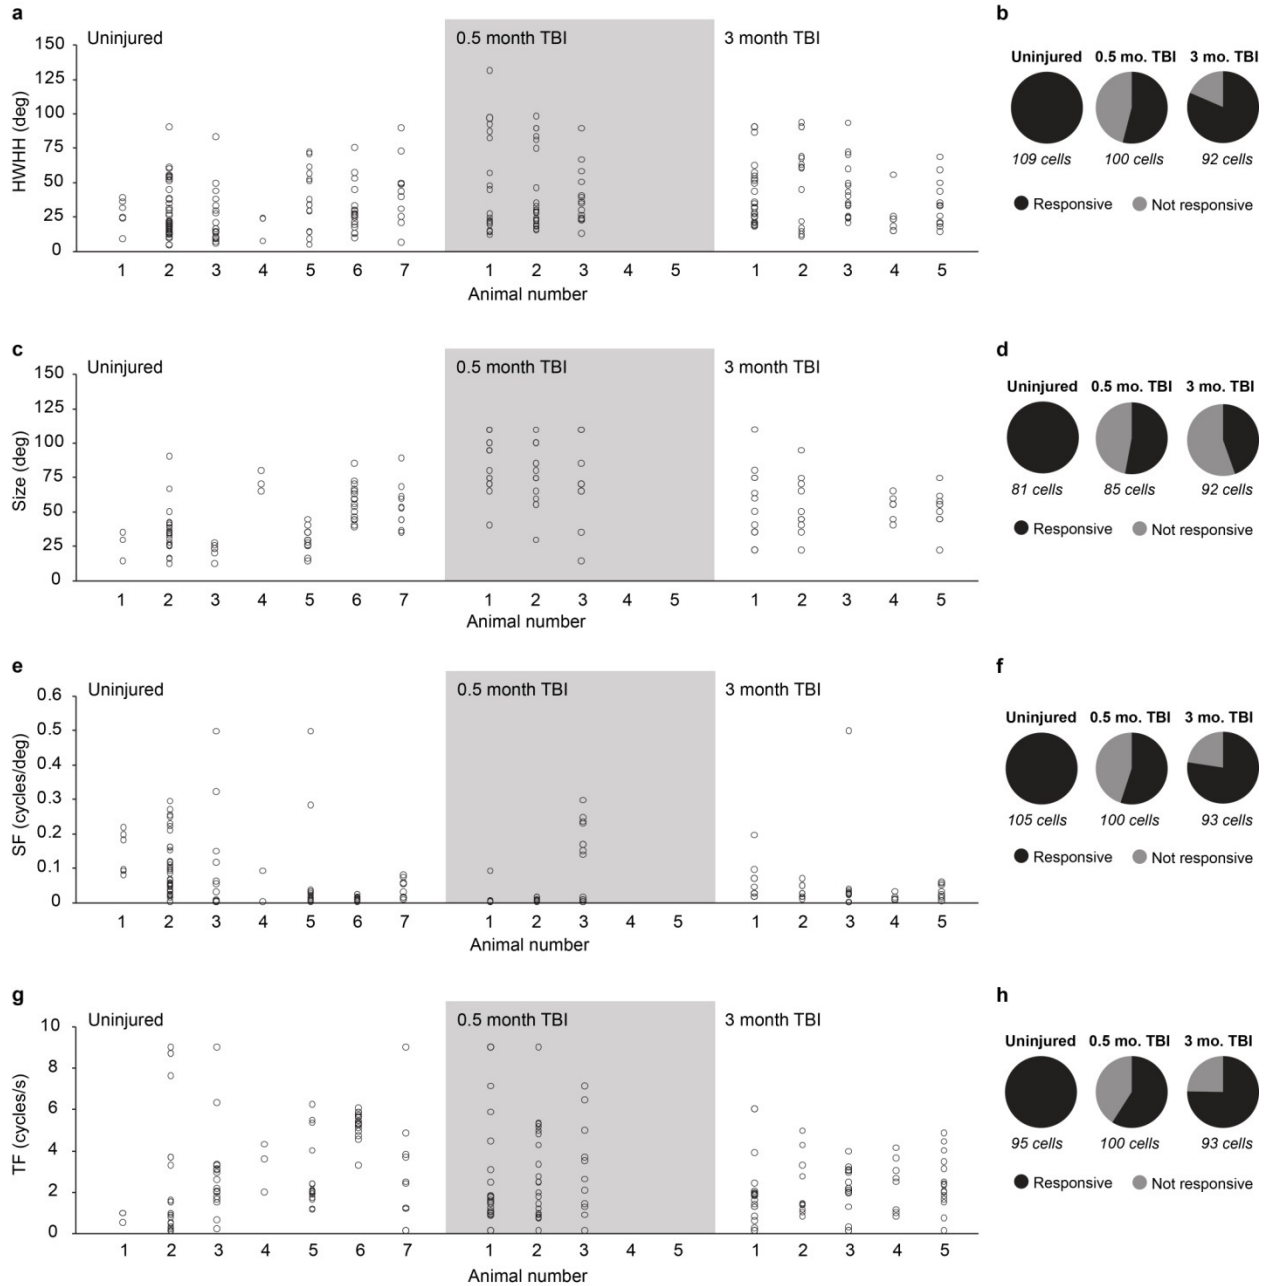

**Supplementary Figure 6. a,c,e,g.** Distribution of half-width at half-height (a), preferred stimulus size (c), preferred spatial (e) and temporal (g) frequencies for each animal in the uninjured (left, 1-7), 0.5 months (middle, 1-5, gray shading) and 3 months (right, 1-5) after TBI groups. **b,d,f,h.** Proportion of cells that were responsive (black) and not-responsive (gray) to each stimulus parameter: orientation (Chi-square = 67.2, df = 2,  $P = 3E-15$ ; b), size (Chi-square = 65.7, df = 2,

$P = 5E-15$ ; d), spatial frequency (Chi-square = 60.2,  $df = 2$ ,  $P = 8.6E-14$ ; f), and temporal frequency (Chi-square = 47.9,  $df = 2$ ,  $P = 4E-11$ ; h).
