# Supplementary material for: Traumatic brain injury to primary visual cortex produces long-lasting circuit dysfunction
Source: PubMed Central journal article supplement (PMC8599505; doi:10.1038/s42003-021-02808-5), 2021-11-17
Supplement: 42003_2021_2808_MOESM2_ESM.pdf [file 42003_2021_2808_MOESM2_ESM.pdf]

## Description of Additional Supplementary Files

**File name:** Supplementary Data 1

**Description:** Cell density quantification 0.5 months after TBI.

**File name:** Supplementary Data 2

**Description:** Cell density quantification 3 months after TBI.

**File name:** Supplementary Data 3

**Description:** Laminar density quantification.

**File name:** Supplementary Data 4

**Description:** Source data.
